# Supplementary material for: Bifidobacterium in the gut microbiota confer resilience to chronic social defeat stress in mice
Source: PubMed Central journal article supplement (PMC5377462; doi:10.1038/srep45942), 2017-04-03
Supplement: srep45942-s1.pdf [file srep45942-s1.pdf]

**Supplemental Information**

***Bifidobacterium* in the gut microbiota confer resilience to  
chronic social defeat stress in mice**

Chun Yang, Yuko Fujita, Qian Ren, Min Ma, Chao Dong & Kenji Hashimoto

Division of Clinical Neuroscience, Chiba University Center for Forensic Mental  
Health, Chiba 260-8670, Japan

Correspondence: Kenji Hashimoto, Division of Clinical Neuroscience, Chiba  
University Center for Forensic Mental Health, Chiba 260-8670, JAPAN.

Tel: +81-43-226-2517; Fax: +81-43-226-2561 (e-mail: hashimoto@faculty.chiba-u.jp)

**Table S1. Time in the interaction zone (sec) of social interaction test**

| No Target |         |             |           | Target  |             |           |      |
|-----------|---------|-------------|-----------|---------|-------------|-----------|------|
|           | Control | Susceptible | Resilient | Control | Susceptible | Resilient |      |
|           | 65      | 62          | 71        | 87      | 56          | 121       |      |
|           | 52      | 69          | 43        | 97      | 62          | 82        |      |
|           | 69      | 55          | 55        | 93      | 43          | 73        |      |
|           | 47      | 61          | 62        | 65      | 1           | 89        |      |
|           | 55      | 41          | 63        | 69      | 26          | 90        |      |
|           | 60      | 70          | 61        | 103     | 38          | 79        |      |
|           | 61      | 62          |           | 115     | 39          |           |      |
|           | 69      | 68          |           | 100     | 58          |           |      |
| Mean      | 59.75   | 61          | 59.17     | Mean    | 92.37       | 40.37     | 89   |
| SEM       | 2.82    | 3.35        | 3.33      | SEM     | 5.44        | 7.06      | 6.90 |

The data are from Figure 1.

**Table S2. Time in the interaction zone (sec) of social interaction test**

| No Target |               |         |               |         | Target        |         |               |       |       |
|-----------|---------------|---------|---------------|---------|---------------|---------|---------------|-------|-------|
| Control   |               | CSDS    |               | Control |               | CSDS    |               |       |       |
| Vehicle   | <i>Bifido</i> | Vehicle | <i>Bifido</i> | Vehicle | <i>Bifido</i> | Vehicle | <i>Bifido</i> |       |       |
| 70        | 44            | 59      | 105           | 73      | 89            | 57      | 94            |       |       |
| 57        | 58            | 82      | 40            | 83      | 156           | 79      | 106           |       |       |
| 61        | 54            | 72      | 91            | 120     | 111           | 33      | 67            |       |       |
| 63        | 89            | 70      | 74            | 78      | 31            | 48      | 45            |       |       |
| 69        | 57            | 31      | 51            | 112     | 111           | 3       | 38            |       |       |
| 72        | 80            | 105     | 81            | 91      | 79            | 3       | 93            |       |       |
| 42        | 59            | 91      | 52            | 102     | 77            | 34      | 81            |       |       |
| 83        | 72            | 70      | 71            | 79      | 77            | 12      | 46            |       |       |
| 64        | 59            | 100     |               | 65      | 93            | 9       |               |       |       |
| 67        | 56            |         |               | 108     | 128           |         |               |       |       |
| Mean      | 64.56         | 64.89   | 75.56         | 70.63   | Mean          | 91.1    | 95.2          | 30.89 | 71.25 |
| SEM       | 3.38          | 3.93    | 7.53          | 7.78    | SEM           | 5.84    | 10.73         | 8.89  | 9.20  |

The data are from Figure 4.

*Bifido: Bifidobacterium*
